# Supplementary material
Source: PubMed Central journal article supplement (PMC1489920)
Supplement: NIHMS9262-supplement-supptable.pdf [file NIHMS9262-supplement-supptable.pdf]

**74 monomers from CATRES**

|      |           |                                                                       |
|------|-----------|-----------------------------------------------------------------------|
| 1a26 | 2.4.2.30  | ADP-ribosyltransferase                                                |
| 1adn | 2.1.1.63  | Methylated-DNA--[protein]-cysteine S-methyltransferase                |
| 1ae7 | 3.1.1.4   | Phospholipase A2 (PLA2)                                               |
| 1ah7 | 3.1.4.3   | Phospholipase C                                                       |
| 1al6 | 4.1.3.7   | Citrate (si)-synthase                                                 |
| 1aop | 1.8.1.2   | Sulphite reductase                                                    |
| 1aq2 | 4.1.1.49  | Phosphoenol pyruvate carboxykinase                                    |
| 1b73 | 5.1.1.3   | Glutamate racemase                                                    |
| 1bg0 | 2.7.3.3   | Arginine Kinase                                                       |
| 1bol | 3.1.27.1  | Ribonuclease T2                                                       |
| 1bti | 3.5.2.6   | Beta-Lactamase Class A                                                |
| 1bwp | 3.1.1.47  | 2-acetyl-1-alkylglycerophosphocholine esterase                        |
| 1c3j | 2.4.1.27  | DNA beta-glucosyltransferase                                          |
| 1cb8 | 4.2.2.5   | Chondroitin AC lyase                                                  |
| 1cd5 | 5.3.1.10  | Glucosamine-6-phosphate isomerase                                     |
| 1chd | 3.1.1.61  | Protein-glutamate methylesterase                                      |
| 1coy | 1.1.3.6   | Cholesterol Oxidase                                                   |
| 1ctt | 3.5.4.5   | Cytidine Deaminase                                                    |
| 1d0s | 2.4.2.21  | Nicotinate-nucleotide-dimethylbenzimidazole phosphoribosyltransferase |
| 1d8c | 4.1.3.2   | Malate synthase                                                       |
| 1dae | 6.3.3.3   | Dethiobiotin synthase                                                 |
| 1db3 | 4.2.1.47  | GDP-mannose 4,6-dehydratase                                           |
| 1dl2 | 3.2.1.113 | Mannosyl-oligosaccharide 1,2-alpha-mannosidase                        |
| 1dli | 1.1.1.22  | UDP-glucose 6-dehydrogenase                                           |
| 1dnk | 3.1.21.1  | Deoxyribonuclease I                                                   |
| 1eug | 3.2.2.3   | Uridine Nucleosidase (Uracil DNA glycosylase)                         |
| 1eyi | 3.1.3.11  | Fructose-1,6-bisphosphatase                                           |
| 1fgh | 4.2.1.3   | Aconitase                                                             |
| 1fua | 4.1.2.17  | L-fuculose-phosphate aldolase                                         |
| 1gim | 6.3.4.4   | Adenylosuccinate synthetase                                           |
| 1gog | 1.1.3.9   | Galactose Oxidase                                                     |
| 1gpr | 2.7.1.69  | The IIAGlc Histidine kinase                                           |
| 1hfs | 3.4.24.17 | Stromelysin-1 (hydrolase)                                             |
| 1i7d | 5.99.1.2  | DNA topoisomerase III                                                 |
| 1jdw | 2.1.4.1   | Glycine amidinotransferase                                            |
| 1kas | 2.3.1.41  | 3-oxoacyl-[acyl-carrier protein] synthase                             |
| 1lba | 3.5.1.28  | T7 Lysosome                                                           |

|      |            |                                                                         |
|------|------------|-------------------------------------------------------------------------|
| 1lcb | 2.1.1.45   | Thymidylate synthase                                                    |
| 1lnh | 1.13.11.12 | Lipoxygenase                                                            |
| 1lxa | 2.3.1.129  | UDP-N-acetylglucosamine acyltransferase                                 |
| 1mbb | 1.1.1.158  | UDP-N-acetylmuramate dehydrogenase                                      |
| 1mek | 1.14.11.2  | Disulphide Isomerase                                                    |
| 1mla | 2.3.1.39   | [Acyl-carrier protein] S-malonyltransferase                             |
| 1moq | 2.6.1.16   | Glucosamine--fructose-6-phosphate aminotransferase (isomerising domain) |
| 1mpp | 3.4.23.23  | Mucoropepsin                                                            |
| 1nid | 1.7.99.3   | Nitrite Reductase (Copper Containing)                                   |
| 1nsp | 2.7.4.6    | Nucleoside-diphosphate kinase                                           |
| 1pgs | 3.5.1.52   | Peptide Aspartylglucosaminidase                                         |
| 1pjb | 1.4.1.1    | Alanine dehydrogenase                                                   |
| 1pkn | 2.7.1.40   | Pyruvate Kinase                                                         |
| 1pud | 2.4.2.29   | Queuine tRNA-ribosyltransferase (tRNA-guanine transglycosylase)         |
| 1qum | 3.1.21.2   | Deoxyribonuclease IV                                                    |
| 1ra2 | 1.5.1.3    | Dihydrofolate reductase                                                 |
| 1rpt | 3.1.3.2    | High molecular weight Acid Phosphatase                                  |
| 1uae | 2.5.1.7    | UDP-N-acetylglucosamine 1-carboxyvinyltransferase                       |
| 1uag | 6.3.2.9    | UDP-N-acetylmuramoylalanine--D-glutamate ligase                         |
| 1ula | 2.4.2.1    | Purine-nucleoside phosphorylase (type 1)                                |
| 1uok | 3.2.1.10   | Oligo-1,6-glucosidase                                                   |
| 1uox | 1.7.3.3    | Urate oxidase                                                           |
| 1vnc | 1.11.1.10  | Chloride peroxidase                                                     |
| 1ytw | 3.1.3.48   | Protein Tyrosine Phosphatase                                            |
| 1zio | 2.7.4.3    | Adenylate kinase                                                        |
| 2acy | 3.6.1.7    | Acylphosphatase                                                         |
| 2alr | 1.1.1.2    | Mammalian Aldehyde Reductase (NADP dependent)                           |
| 2cpo | 1.11.1.10  | Heme Chloroperoxidase                                                   |
| 2hgs | 6.3.2.3    | Glutathione Synthase                                                    |
| 2jcw | 1.15.1.1   | Superoxide dismutase                                                    |
| 2phk | 2.7.1.38   | Protein Serine/threonine kinase                                         |
| 2plc | 3.1.4.10   | 1-phosphatidylinositol phosphodiesterase                                |
| 5enl | 4.2.1.11   | Enolase                                                                 |
| 5fit | 3.6.1.29   | diadenosine P1, P3-triphosphate (ApppA) hydrolase                       |
| 8pch | 3.4.22.16  | Cathepsin H.                                                            |
| 8tln | 3.4.24.27  | Metalloproteinase M4                                                    |
| 9pap | 3.4.22.2   | Thiol-Endopeptidase                                                     |

## 24 proteins in set 1

|             |          |                                      |
|-------------|----------|--------------------------------------|
| <b>10gs</b> | 2.5.1.18 | Human glutathione S-transferase P1-1 |
|-------------|----------|--------------------------------------|

|             |           |                                            |
|-------------|-----------|--------------------------------------------|
| 1a16        | 3.4.11.9  | Aminopeptidase P                           |
| <b>1a30</b> | 3.4.23.16 | HIV-1 protease                             |
| 1a3b        | 3.4.21.5  | Human $\alpha$ -thrombin heavy chain       |
| 1a42        | 4.2.1.1   | Human carbonic anhydrase II                |
| 1a47        | 2.4.1.19  | CGTase                                     |
| 1a5i        | 3.4.21.68 | Plasminogen activator                      |
| 1a5v        | 2.7.7.49  | Asv integrase                              |
| 1aec        | 3.4.22.14 | Actinidin                                  |
| 1a18        | 1.1.3.15  | Glycolate oxidase                          |
| <b>1arz</b> | 1.3.1.26  | E Coli. Dihydrodi-picolinate reductase     |
| 1b3n        | 2.3.1.41  | $\beta$ -ketoacyl carrier protein synthase |
| 1b6a        | 3.4.11.18 | Methionine aminopeptidase 2                |
| 1bgq        | N/A       | N-Terminal domain of yeast Hsp90           |
| 1bh6        | 3.4.21.62 | Subtilisin DY                              |
| 1bv v       | 3.2.1.8   | G/11 xylanase                              |
| 1blc        | 3.5.2.6   | $\beta$ -lactamase                         |
| 1br6        | 3.2.2.22  | Ricin                                      |
| 1bio        | 3.4.21.46 | Human Complement Factor D                  |
| 1bk9        | 3.1.1.4   | phospholipase A2                           |
| 1bxo        | 3.4.23.20 | Penicillopepsin                            |
| <b>1cp3</b> | 3.4.22.-  | Apopain                                    |
| 1cq q       | 3.4.22.28 | Human Rhinovirus 3C Protease               |
| <b>1cr6</b> | 3.3.2.3   | Murine Soluble Epoxide Hydrolase           |

Note: All the enzymes are monomers except for 10gs, 1a30, 1cp3, 1cr6, 1arz, which are bold-face marked.
